# Supplementary material for: Development and optimisation of an intervention to increase the intention to act on health and health equity within the private sector of urban development: an evidence, theory and Person-Based Approach
Source: Research Square preprint supplement (doi:10.21203/rs.3.rs-5610820/v1), 2025-04-11
Supplement: Supplementary file 1 [file 1110b061ee7db5a3a65f5ea6.docx]

Table 4: Changing Mindsets Intervention Behavioural analysis table

| **Target behaviour** | **Barriers/ *facilitator* to the target behaviour** | **Evidence for barrier/ facilitator/ intervention ingredient** | **Intervention ingredient** | **Theoretical constructs** | **Target construct (BCW)**  **COM-B model** | **Theoretical domains framework** | **Intervention types (BCW)** | **Behaviour Change Techniques**  **(using 93 Behaviour Change Technique taxonomy v1)** |
| --- | --- | --- | --- | --- | --- | --- | --- | --- |
| **Key behaviour: industry partner engaging in the project, co-design and delivery of the intervention** | | | | | | | | |
| Agreeing to be involved and engage in co-design of the intervention | -Time  - Competing priorities - short term profits vs long term improvements in health. Not seeing the value of the project to themselves or their organisation*.*  *-Provide access to new information from the TRUUD study e.g. HAUS model, legal risks of not integrating health*  *-Provide opportunities for them to come into contact with policy decision makers involved in TRUUD*  -*Believing in the aim of the intervention*  -*Ease of engagement* | (Lee, Hon et al. 2018, Riley and de Nazelle 2018, Black, Pilkington et al. 2021, Pineo and Moore 2022, Bates, Ayres et al. 2023).    Feedback from conversations with potential industry partners and from members of the team who work in urban development indicated senior decision-makers are very busy people with lots of competing priorities and need convincing of benefits of delivering the intervention to themselves and their organisation. | Highlight potential benefits of involvement in the project:   - Benefits to society, Improving the urban environment (reduce cognitive proximity) - Benefits to the organisation (e.g. alternative viability mechanisms, reputation for being pioneers, positively viewed by stakeholders). Develop a co-branded tool that can be used by the industry partner/organisation beyond the project. - Industry partner (e.g. reinforces positive self- identity, aligns with personal values) | Power – resource-based, knowledge-based; Proximity – cognitive | Motivation (reflective);  Opportunity (Social) | Knowledge;  Social/professional role and identity;  Beliefs about consequences;  Intentions;  Goals;  Environmental context and resources;  Social influences | Education;  Persuasion;  Incentivisation;  Enablement | 1.9. Commitment;  5.3. Information about social and environmental consequences;  10.8. Incentive (outcome);  13.1. Identification of self as role model |
| Delivering sessions | -Lack of knowledge about the issue  -Not having bought in to content of materials.  -Subsequently having challenges guiding discussion to sufficiently change discourse, and norms.  -*Ease of delivery of the intervention*  *-Exposure to evidence that reduces psychological proximity (cognitive & emotional) to the issue*  *-Co-design materials, which involves buy-in to the issue. Multiple viewing of the material, reduces proximity and promotes familiarity with the contents*  *-Provide opportunities to discuss the issues and to present the intervention in a practice setting with feedback*  *-Have the events correspond with events the industry partner would already attend/are beneficial for them to attend* | (Van Boven, Kane et al. 2010, Chang 2018, Lee, Hon et al. 2018, Riley and de Nazelle 2018) (Henderson, Huang et al. 2012, Riley and de Nazelle 2018, Bates, Ayres et al. 2023).  Feedback from conversations with potential industry partners about events that they are going to be attending. | -Co-design intervention materials and plans for implementation with the industry partner to support buy-in and to promote familiarity with the topic.  - Have the industry partner review and feedback on all aspects of the intervention, including the lived experience videos which aim to increase psychological proximity (cognitive & emotional) with the issue.  - Develop a script with prompts for the industry partner to guide the presentation and discussions to support the delivery of behaviour change elements and shifting of norms.  - Have members of the intervention team in the room to support the discussion  - Industry partner and intervention team reflect on the successes or challenges after the session has been run- to record any thoughts about changes that need to be made before the next intervention event. | Proximity – cognitive, emotional; Group norms | Capability; Opportunity | Knowledge;  Skills;  Beliefs about capabilities;  Beliefs about consequences;  Intentions;  Social influences;  Emotion;  Memory, attention and decision processes | Education;  Persuasion;  Training;  Enablement; | 1.4. Action planning;  1.9. Commitment;  2.2. Feedback on behaviour;  3.2. Social support (practical);  4.1. Instruction on how to perform the behavior;  5.2. Salience of consequences;  8.1. Behavioral practice/rehearsal  9.1. Credible source;  15.1. Verbal persuasion about capability |
| **Key behaviour: target groups engaging with the intervention session** | | | | | | | | |
| Attending the intervention session delivered by the industry partner | *-* Not knowing about the session  - Lack of interest in integrating health into urban development  - Not understanding how the session might benefit them or their work  - Not believing that they have the power to prioritise health in their work  - Not feeling they have the time to attend  - *Highlight the benefits of attending the session and how it will address some of the known barriers to integrating health into urban development for the target group.*  *- Wanting to see the industry partner present*  *-Other peers attending the session* | (Merton 1972, Chang 2018, Riley and de Nazelle 2018, Black, Pilkington et al. 2021, Pineo and Moore 2022, Bates, Ayres et al. 2023, Le Gouais, Bates et al. 2023) | Deliver the intervention at general urban development events rather than those focussed on health. We want to make sure we are able to target people who are not yet bought into/already integrating health and health inequalities into urban development.    The intervention sessions will be advertised through conference and TRUUD communications channels to bring attention to the intervention sessions. At the smaller events, attendees may be invite only and will be emailed ahead of the event.    Adverts for the intervention sessions will be co-designed with the industry partners and should highlight benefits of attending, e.g. we will be giving examples of:   - Risks of not doing anything on health - Benefits of taking action- to society, themselves and their organisations - Examples of where other organisations have prioritised health, the challenges they faced and how they overcame them. - Highlight tools that can support cost/benefit analysis of integrating health into urban development e.g. the TRUUD HAUS tool - Adverts should also highlight the prestige of the industry partner | Power – resource-based, knowledge-based; Collective efficacy – empowerment; Group norms | Opportunity; Motivation | Knowledge;  Beliefs about capabilities;  Optimism;  Beliefs about consequences;  Reinforcement;  Goals;  Social influences | Persuasion;  Incentivisation | 6.2. Social comparison  10.8. Incentive (outcome) |
| Engaging with the materials/messaging during the intervention session | -Do not believe they have power to prioritise health in urban development- in part because they believe others don’t care enough to do anything, structurally there are barriers (e.g. if the client doesn’t want it, it doesn’t happen), traditional mindsets (e.g. attributed to things like an ‘old boys’ club’) preference for what has been done before with predictable outcomes, and lack of incentives for prioritising health.  - Narrow definition of health in urban development led to many urban planners and developers not viewing health as their responsibility, or in their remit to influence.  -Decisions are made that prioritise financial viability rather than health  - Evidence linking health with urban environments is often technical and complex  -Narrative accounts that are long or not supported with quantitative data are not seen as convincing  -Believe the incorporation of health into urban development and development to be risky  -Not finding the presenter convincing  *-Provide examples of how health can increase the value of the company/ highlight mechanisms that can change the viability equation for developers*  *-Increase the psychological (cognitive and emotional) proximity*  *-Industry insider deliver the intervention session* | (Merton 1972, Foucault 1980, Meadows 1999, Wijen and Ansari 2007, Carmichael, Barton et al. 2012, Henderson, Huang et al. 2012, Chang 2018, Lee, Hon et al. 2018, Riley and de Nazelle 2018, Sparkman and Walton 2019, Black, Pilkington et al. 2021, Pineo and Moore 2022, Bates, Ayres et al. 2023, Le Gouais, Bates et al. 2023)(19, 25, 41-44, 46 | - Intervention content addresses known needs, issues and challenges for the target group prioritising health:   - Highlight lesser known causal pathways between features of the urban environment and health   - Risks of not doing anything on health   - Benefits of taking action- to society, themselves and their organisations   - Examples of where other organisations have prioritised health, the challenges they faced and how they overcame them.   - Highlight tools that can support cost/benefit analysis of integrating health into urban development e.g. the TRUUD HAUS tool - Presenting information in different formats- including lived experience/ case studies accompanied by quantitative data presented in an accessible way. - Intervention delivered by an industry insider who has credibility within the industry. - The industry insider will contextualise the information for the audience to make it more relatable for the target group - Frame health and health equity solutions/ actions in language consistent with normative expectations of target group (e.g. that health can help to make money, reduce risks etc.) - Deliver the intervention in a group setting with discussion to foster shared language, a sense of group mission, and learning from the experience of others | Collective efficacy – empowerment, social control, social cohesion; Group norms; Power – resource-based, knowledge-based, confirm-structuration; Proximity – emotional, cognitive | Capability (psychological);  Opportunity (physical and social);  Motivation (reflective and automatic) | Knowledge;  Skills;  Social/professional role and identity;  Beliefs about capabilities;  Beliefs about consequences;  Intentions;  Goals;  Memory, attention and decision processes;  Environmental context and resources;  Social influences;  Emotion | Education;  Persuasion;  Incentivisation;  Training;  Environmental restructuring (social);  Modelling | 3.1. Social support (unspecified);  4.1. Instruction on how to perform the behavior;  5.1. Information about health consequences;  5.2. Salience of consequences;  5.3. Information about social and environmental consequences;  5.6. Information about emotional consequences;  6.1. Demonstration of the behavior;  6.2. Social comparison;  9.1. Credible source;  10.5. Social incentive;  12.2. Restructuring the social environment;  13.4. Valued self-identify ;  13.5. Identity associated with changed  Behavior ;  15.1. Verbal persuasion about capability |
| Engaging in planning actions to take to integrate and prioritise health into their work | -Do not believe they have power to prioritise health in urban development- in part because they believe others don’t care enough to do anything, structurally there are barriers (e.g. if the client doesn’t want it, it doesn’t happen), traditional mindsets (e.g. attributed to things like an ‘old boys’ club’) preference for what has been done before with predictable outcomes, and lack of incentives for prioritising health.  - Narrow definition of health in urban development led to many urban planners and developers not viewing health as their responsibility, or in their remit to influence.  -Decisions are made that prioritise financial viability rather than health  - Evidence linking health with urban environments is often technical and complex  -Narrative accounts that are long or not supported with quantitative data are not seen as convincing  -Believe the incorporation of health into urban development and development to be risky  -There is a lack of awareness of actionable interventions  *-Provide examples of how health can increase the value of the company/ highlight mechanisms that can change the viability equation for developers*  *-Increase the psychological (cognitive and emotional) and social proximity*  **-** *Motivating actors to co-operate by invoking ethical factors such as a sense of fairness, equity, and altruism*  *-Highlight risks of not prioritising health*  *-Provide examples of how other organisations have prioritised health* | (Merton 1972, Foucault 1980, Meadows 1999, Wijen and Ansari 2007, Carmichael, Barton et al. 2012, Henderson, Huang et al. 2012, Chang 2018, Lee, Hon et al. 2018, Riley and de Nazelle 2018, Sparkman and Walton 2019, Black, Pilkington et al. 2021, Pineo and Moore 2022, Bates, Ayres et al. 2023, Le Gouais, Bates et al. 2023) | - Belief that other people in the industry don’t care about health – we show dynamic minority norm (others are beginning to act on health) - Structural barriers to change and risk of prioritising health – we show how organisations and people are overcoming these with case studies and through discussion ‘*What are colleagues already doing on health’* - Traditional mindsets (e.g. risk aversion) –demonstrate dynamic minority norm - Lack of incentives to change – provide information about risks and benefits (including to society, their organisation and themselves tapping into altruism and fairness) - Provide information about the wider determinants of health and highlight where in the system urban developers have influence     -Enable individuals to recognise they have power in the form of choices to incorporate aspects of health into their practice e.g. investigating/researching health for themselves, learning from what others are doing the sector e.g. reflective practice, pilot work, overcoming systemic issues. Connecting with others who are acting on health - or want to act on health  -Supporting decision makers to recognize collective power to change:  -Deliver the intervention in group settings, where individuals feel that they can make a change as part of a collective.  -Provide evidence that contemporaries are already integrating health into their practice and reaping the benefits (supporting collective efficacy, increasing psychological proximity, demonstrating the dynamic minority norm)  -Intervention delivered by an industry partner in the field of urban development- addressing the issue of the ‘old boys’ club’ and increasing psychological proximity as the industry partner is taking action to address issues of socially distant users of the urban environment.  -During discussion session - ask ‘what are colleagues in your industry already doing?’. This creates awareness around social control within the in-group, as people discuss and are made more aware of who they think is active and is acting in the ‘common good’. (*Collective efficacy - social control*)  -Increase proximity by pairing of short emotional narrative accounts underpinned by accessible statistical evidence.  -Frame health and health equity solutions/ actions in language consistent with normative expectations of target group (e.g. that health can help to make money, reduce risks etc.)  -Highlight the legal risks of not considering health in urban development.  -Signpost attendees to more detailed information available on the Changing Mindsets website. Highlight what organisations provide networks and support to integrate health into urban development.  -Discuss with other participants solutions to raising health up the agenda, drawing on example from what others are doing  -Support the 'defining of a new Discourse' that prioritises health in the urbanenvironment through discussion and debate.  -The discussion also supports reflective practice- where learning from others fills gaps in knowledge in the sector about how to prioritise health.    -Making plans for actions they are going to take to prioritise health:   - At in-person events provide postcards for participants to write concrete actions they plan to take to prioritise health and people they have met that they would like to connect with after the event to keep the conversation going. It will also have the QR code for the Changing Mindsets resources website. - At the online events they will be asked to email themselves with the same information and the link to the Changing Mindsets resources website will be added to the chat as well as the QR code being included on the final slide. | Collective efficacy – empowerment, social control, social cohesion; Group norms; Power – resource-based, knowledge-based, confirm-structuration; Proximity – emotional, cognitive | Capability (psychological);  Opportunity (physical and social);  Motivation (reflective and automatic) | Knowledge;  Social/professional role and identity;  Beliefs about capabilities;  Beliefs about consequences;  Intentions;  Goals;  Memory, attention and decision processes;  Environmental context and resources;  Social influences;  Emotion | Education;  Persuasion;  Environmental restructuring (social);  Modelling | 1.1. Goal setting (behavior);  1.2. Problem solving;  3.1. Social support (unspecified);  6.2. Social comparison;  10.5. Social incentive;  12.2. Restructuring the social environment;  13.4. Valued self-identify ;  13.5. Identity associated with changed  Behavior ;  15.1. Verbal persuasion about capability |
| Engaging in discussion during intervention sessions | - Not feeling confident to engage in discussion in groups - Not feeling that they can contribute to discussion - Not wanting to join because they don’t see it as useful - *Create an inclusive environment* - *Use language that is accessible (not jargon heavy and is well explained) and represents the group norms* | (Foucault 1980, Lee, Hon et al. 2018, Pineo and Moore 2022, edu 2023) (Pineo and Moore 2022). | - Foster a sense of in-group belonging and a group mission and encourage the sharing of ideas about the issue to reduce psychological distance. This can be done by using breakout group discussions/time for informal networking/providing links to organisations running networks.    Create an inclusive environment for discussion:   - Allow participants to introduce themselves in small group settings - Provide multiple opportunities to engage in group discussion - Provide opportunities for participants to share ideas that have emerged from group discussion - Provide different ways for individuals to have their questions answered e.g. Q & A at the end/signposting to TRUUD contacts/opportunities to speak to the speaker and TRUUD team - Frame information and questions using language that represents group norms - Respectful moderation of discussion   Feedback on group discussion:   - In smaller groups: participant comments summarised in a feedback session through members of the group reporting back on what they have discussed - In larger groups or online events, feedback added to Mentimeter digital software - each question will have a QR code which will take them to the Mentimeter page for the question. Members of the group are asked to add their responses to Mentimeter. The industry partner will then pick out themes for discussion during the feedback session - Provide positive reinforcement for each contribution | Power – knowledge-based, confirm-structuration; Collective efficacy – empowerment, social cohesion; Proximity – emotional, cognitive; Group norms | Capability (giving them tools/language to take part in discussion);  Opportunity;  Motivation | Beliefs about capabilities;  Environmental context and resources;  Social influences;  Emotion;  Skills | Environmental restructuring;  Enablement | 3.1. Social support;  10.4. Social reward |
| Engaging with other attendees during and after the intervention session | - No time for networking - Anxious of making connections with others - Not seeing the value in making connections - *Provide opportunity for networking following the session within the time allocated to the session (event slot allowing)* - *Select events that incorporate networking opportunities around the session* - *Create a sense of collective action where individuals feel they are able to make a change as part of a group* | (Foucault 1980, Bandura, Freeman et al. 1999, Meadows 1999, Carmichael, Barton et al. 2012, Lee, Hon et al. 2018, Riley and de Nazelle 2018, Pineo and Moore 2022, Le Gouais, Bates et al. 2023) | - Group work during the intervention session - Deliver intervention at events that provide networking opportunities in the wider programme - Provide an opportunity for individuals to introduce themselves - so people can follow-up with those with similar interests at the end of the session - Provide postcards with space to write down contacts they have made in the session | Collective efficacy – social cohesion, empowerment; Power – knowledge-based, resource-based | Opportunity;  Motivation | Reinforcement;  Social influences;  Environmental context and resources ;  Knowledge ;  Social/professional role and identity | Incentivisation;  Environmental restructuring;  Persuasion | 3.2. Social support (practical) |
| **Key behaviour: fostering discussion and problem solving between policy makers and the target group** | | | | | | | | |
| Run event to establish cross-sector discussion, collaboration, networking and problem-solving | - Challenges finding a date they can all attend - Finding a location that is easy for them to attend - Making it appealing to attend - Cost to put on a good event - Time to pull the event together - *Provide content at the event that is appealing to both groups* - *Hold at a location that is appealing and easy to access for both parties e.g. London* - *Collaborate with others who are running an event - have the resources and time to organise e.g. national government Team in TRUUD, or TCAP* | Decision-makers in urban development are very busy and have multiple competing priorities that limit the time that they spend engaging in integrating health into their projects  (Black, Pilkington et al. 2021)    Qualitative data from the baseline interviews - private sector actors feel that policy needs to change to support the industry to prioritise health and have some concrete suggestions on what needs to change. | - Opportunities for discussion between policy makers and private sector actors to discuss barriers and facilitators to prioritising health in the urban environment in cross-sectoral sessions (*Discourse*) - Provide link to resources they can access beyond the event - Opportunity for sharing of contacts so discussion can continue past the event. e.g. continued email correspondence - additional planned events. Names of attendees included in the programme - We will highlight this as an opportunity for private sector to have their needs heard and troubleshoot issues they may encounter. Policy makers will be able to hear directly from senior decision-makers in the private sector about what challenges they face and how policy changes could help.   The national government intervention team included:   - Postcards provided for people to write actions they will take - these will be posted 6 months later with the offer of support from the TRUUD team to help them achieve these goals | Collective efficacy – social cohesion, empowerment; Power – resource-based, knowledge-based | Capability -knowledge;  Opportunity- psychological &physical; Motivation - reflective& automatic | Knowledge;  Skills;  Social/professional role and identity;  Beliefs about capabilities;  Optimism;  Beliefs about consequences;  Goals;  Memory, attention and decision processes;  Social influences;  Emotion | Education;  Persuasion;  Incentivisation;  Coercion;  Training;  Environmental structuring;  Modelling;  Enablement | 1.2 Problem solving;  1.3 Goal setting (outcome)  1.6 Discrepancy between current behaviour and goal;  3.1 Social support (unspecified);  4.1 Instructions on how to perform behaviour;  5.2 Salience of consequences;  5.3 Information about environmental and social consequences;  6.1. Demonstration of the  Behavior;  6.2. Social comparison;  9.1. Credible source;  10.4. Social reward;  10.5. Social incentive;  10.7. Self-incentive;  10.9. Self-reward;  12.2. Restructuring the social  Environment;  13.2. Framing/reframing;  13.4. Valued self-identify;  13.5. Identity associated with changed  Behavior;  15.1. Verbal persuasion about  Capability; |
| **Key behaviour: target groups engaging with the intervention follow-up materials and information** | | | | | | | | |
| Engaging in longer term networking/ discussion | - Not being aware of available networks - Not seeing the value of joining networks - *Making connections during the intervention events* - *Having an awareness of the value of the networks e.g. for answering questions about integrating health into urban development* - *Signposting to existing networks* |  | - Highlight existing networks they can join that focus on health in the urban environment - Provide an easy way for people to find out about the networks on the intervention resources webpage – QR code provided on the final slides and on the postcards on the table - On the webpage - highlight what they can expect from the network e.g. keep up to date on latest resources, tools, examples of how to integrate health into urban development/ provide a place to go to ask questions. | Collective efficacy – social cohesion, empowerment; Power – knowledge-based, resource-based | Opportunity (physical and social);  Motivation (conscious) | Knowledge;  Reinforcement;  Social influences;  Environmental context and resources | Education;  Incentivisation;  Environmental restructuring | 1.9. Commitment  3.2. Social support (practical)  10.5. Social incentive |
| Engagement with the intervention website/follow-up materials following the session | - Not knowing it exists - Not seeing value in it - Not having strong digital skills - *Website/newsletters contains information that the target groups have said they are interested in, tools to support prioritising issues, understanding orders of magnitude and communicating value* - *Provide information about the webpage and easy ways to access it* | (Van Boven, Kane et al. 2010, Henderson, Huang et al. 2012, Chang 2018, Lee, Hon et al. 2018, Riley and de Nazelle 2018, Black, Pilkington et al. 2021, Bates, Ayres et al. 2023). | Highlight the information contained on the website - e.g. more detailed information than was possible to cover in the intervention session, including:   - Videos of the lived experience of living in unhealthy environments - Examples of where organisations have integrated health into urban development projects - Tools that can support cost/benefit analysis of integrating health into urban development     Signpost the attendees of the intervention event to the website/other materials during the session and after if possible. Include post cards with a QR code linking to the website & include QR code on the presentation    Ask for feedback on the website to see if any more information needs to be added in follow up interviews    Make the website easy to navigate.    Ensure the website has an address that is easy to find e.g. using search engines and by typing (not too long/complicated) | Proximity – cognitive, emotional; | Opportunity (physical);  Motivation (reflective) | Knowledge;  Skills;  Reinforcement;  Intentions;  Goals;  Memory, attention and decision processes;  Social influences;  Emotion | Education;  Incentivisation;  Enablement | 1.9 Commitment;  4.1. Instruction on how to perform the behaviour;  10.8 Incentive (outcome) |
| **Key behaviour: engagement with research data collection** | | | | | | | | |
| Complete surveys | - Time - Not understanding the importance - Not easy to complete - Forgetting to complete - Not liking engaging in research - *Highlight the importance of completing the survey* - *Make them as short as possible* | (Chang 2018, Le Gouais, Bates et al. 2023) | *General*   - Explain why it is important that we collect survey data - Collect minimum data possible/make it as short as possible - Collect essential data (primary outcomes) first   *Survey on the day:*   - Provide opportunity to complete the survey on the day on paper (in-person events) - seeing others completing the surveys may normalise it for the group - Ask the industry partner to highlight how important it is to complete - TRUUD team bring attention to the survey - Have a slide on the screen highlighting the need to complete the survey   3-month follow-up surveys:   - Send via email with prompts for those who have not completed the survey. | N/A | Opportunity (physical);  Motivation (reflective) | Knowledge;  Environmental context and resources;  Social influences;  Memory, attention and decision processes | Education;  Persuasion;  Environmental restructuring;  Enablement | 3.1. Social support (unspecified);  4.1 Instruction on how to perform the behaviour;  6.2 Social comparison;  10.2 Material reward (behaviour);  12.1 Restructuring of the physical environment |
| Agree to be interviewed following the intervention session | - No time - Not understanding the purpose - Not interested - *Making it easy to take part, by working flexibly around their schedule* - *Provide information about how valuable it is to have their time and insights* - *Keeping the length of the interview as short as possible* | - Primary qualitative work and feedback from conversations with potential industry partners and from members of the team who work in urban development - indicated decision-makers are very busy people with lots of competing priorities (Le Gouais, Bates et al. 2023). | -Conducting interviews to fit around the participant’s schedule  -Keeping interviews as short as possible  - Making the purpose of the interviews clear e.g. they can improve and shape the intervention and future iterations can include more of what they are interested in  - Offering phone and videocall interviews | N/A | Opportunity (physical);  Motivation (reflective) | Knowledge;  Social influences;  Social/professional role and identity;  Memory, attention and decision processes | Persuasion; | 10.8. Incentive (outcome);  13.4 Valued self-identity (e.g. someone who helps); |
