# Supplementary material for: Development and optimisation of an intervention to increase the intention to act on health and health equity within the private sector of urban development: an evidence, theory and Person-Based Approach
Source: Research Square preprint supplement (doi:10.21203/rs.3.rs-5610820/v1), 2025-04-11
Supplement: Supplementary file 2 [file 524ea790dbcfd2723d186cef.docx]

Table 2: Themes from the scoping review related to the behavioural/psychosocial issues, needs and challenges to incorporating health into urban planning

| ***Key themes*** | **Detail of the issue, need or challenges from the literature** | **Recommendations to address the issue, need or challenge from the literature** |
| --- | --- | --- |
| ***Absence of agreed broad definition of health*** | **Lack of agreement on the definition of health:** The urban development sector has a tendency to focus on physical and environmental health concerns, such as air, water and noise issues, rather than on the broader social and cultural determinants of health (Carmichael, Barton et al. 2012, Chang 2018, Le Gouais, Bates et al. 2023).  **Where the responsibility lies for health**: the narrow definition of healthleads to urban developers not viewing health as their responsibility (Riley and de Nazelle 2018, Le Gouais, Bates et al. 2023).  **Believe they are already addressing health**: Due to the narrow definition of health, some developers felt they had already consulted on health but had not had any input from the public health team, or they had not addressed the range of public health concerns and the “wider determinants” of health expected by the council (Chang 2018). | **Provide a definition of the wider determinants of health** (Carmichael, Barton et al. 2012). |
| ***Position of power*** | Private sector actors appeared motivated to improve people's health, but felt they had limited power integrate health into urban planning (Le Gouais, Bates et al. 2023). There were accusations of an ‘old boys’ network’ in some private sector organisations that shaped decision-making (Le Gouais, Bates et al. 2023)  There is an unresolved question in Pineo et al.’s (2022) interviews as to whether professionals can ‘convince private sector developers’, with arguments about wider value. They concluded that this points to inherent power differentials between developers and other stakeholders (Pineo and Moore 2022). | None |
| ***Competing priorities - short term profit over long-term health*** | **Health is not as high on the agenda as financial gain**: Investors and developers make decisions based on financial viability and increasing the value of the company as opposed to improving health outcomes (Black, Pilkington et al. 2021, Bates, Ayres et al. 2023, Le Gouais, Bates et al. 2023). Where associated health costs have a direct financial impact on an organisation, they are energised to act (Black, Pilkington et al. 2021, Pineo and Moore 2022, Bates, Ayres et al. 2023).  **Challenges of the ‘green premium’:** Developers are aware that they can add value to their developments by including “healthy” elements in them. However, higher prices due to ‘green premiums’ may exacerbate inequalities (Le Gouais, Bates et al. 2023).  **Outcome vs output driven**: Organisations more willing to take a healthy design approach were described as *outcome-driven* and those who are not described as *output-driven*. Both developers were focused on finances, however the outcome-driven companies are more likely to integrate health-promoting design, within financial limits (Pineo and Moore 2022).  **Shift from short-term cost to long-term gain:** There was an indication of a recent shift in developers’ conceptualisations of economic value, from short-term costs to long-term gains, thereby affecting how design teams can make a business case (Pineo and Moore 2022, Le Gouais, Bates et al. 2023)*.*  **Communicate value and cost:** There is evidence that high-quality development creates value for health, social, economic and environmental outcomes. However, market structures prevent developers from accounting for these wider economic costs and benefits in their financial viability calculations (Pineo and Moore 2022). | **Highlight benefit of healthy place for the organisation**- for legacy and reputation of the company and provide examples of other companies who are doing this(Chang 2018)  **Propose alternate viability models:** There is a need to pragmatically evaluate the mechanisms that could change the viability equation for developers (7). |
| ***Absence of shared norms, language and values*** | **Lack of intersectoral collaboration**: Has resulted in a lack of inter-sectoral understanding and knowledge, leading to a lack of trust, which hindered future partnership working (Carmichael, Barton et al. 2012, Riley and de Nazelle 2018).    **Different language and values:** Various organisations who need to work together in order to integrate health considerations into planning often have very different cultures, and use different languages and terminologies. This can cause problems in interpretation and contextualisation of key terms such as health. (Carmichael, Barton et al. 2012, Black, Pilkington et al. 2021, Pineo and Moore 2022)*.* | **Need for formal and informal networking structures** (Carmichael, Barton et al. 2012, Riley and de Nazelle 2018).    **Support the development of a shared language:** Common languages can help the integration of different forms of knowledge, expertise and life experience and can in turn help identifying broader problem definition to consider health outcomes of planning decisions (Carmichael, Barton et al. 2012).  **Shifting norms:** Urban planners and developers spoke of discussing, persuading, negotiating, and influencing to bring forward specific healthy design measures (Pineo and Moore 2022).  **Develop shared values regarding health in developments** (Black, Pilkington et al. 2021). |
| ***Risks of claiming healthy placemaking*** | **Risk of claiming healthy placemaking:**   - **Lack of control**: About the measurable or perceived health impacts of development (Pineo and Moore 2022) - **Perceived risk of costs** associated with design team knowledge gaps, expensive materials or technical systems, certification, community participation, maintenance and more. There is also is a lack of data about whether healthy buildings can achieve a higher value for commercial developers (Pineo and Moore 2022). - **Challenge of applying industry standards** (Pineo and Moore 2022). | **Provide examples of how to de-risk healthy place-making (Pineo and Moore 2022):**   - **Pilot projects:** Overcome the perceived risks and typical economic constraints of new development. Can be used to explore innovative practices without necessarily promising success. - **Standards**: Were seen to de-risk healthy building processes because the responsibility can be shifted to the standard itself (i.e. for both success or lack thereof). - **Cost-related risks will continue to drop over time**: As the supply chain (and potentially the public) respond to the healthy building agenda. The challenge is to make the case to developers that “high quality” does not necessarily mean “high specification” and “hard infrastructure”, all of which often lead to higher construction costs and will ultimately lead to higher house prices. - **Explore longer term return of investment**: The economic constraints and risks associated with healthy development may be dampened for developers if they retain properties and measure their return on investment over many years. |
| ***Need for advocates/champions*** |  | **Need for advocates or champions to drive the prioritisation of health** (Pineo and Moore 2022, Le Gouais, Bates et al. 2023). |
| ***Need for accessible convincing evidence*** | **Translation of evidence**: the majority of urban health challenges are well known to decision-makers, including air pollution, excessive car use, obesogenic food environments, mental health, and the need for access to nature (Black, Pilkington et al. 2021). However, there is a challenge effectively communicating the relationship between the built environment and health, which is complex. So decision makers are left with only a partial understanding (Riley and de Nazelle 2018), and often unaware of how their development can make a specific impact on improving health and wellbeing (Chang 2018). Developers described needing to be convinced of the added value of healthy developments, about health improvements or financial benefits from other projects. The absence of evidence made building a *‘business case’* challenging (Pineo and Moore 2022)*.*  **Accessibility of evidence:** providing evidence through lengthy narrative accounts is impractical, and over-technical data has been identified as a barrier to utilisation (Bates, Ayres et al. 2023).  **Convincing evidence***: S*ome urban planners and developers were distrustful of narrative evidence. Data, statistics and modelling were often referred to as necessary to underpin qualitative accounts (Bates, Ayres et al. 2023). | **Need to pair emotive narratives with accessible quantitative data evidence**: Lived experiences were shown to be important in getting the attention of busy people and making them care enough to invest valuable time in seeking change (Riley and de Nazelle 2018, Bates, Ayres et al. 2023). Narratives supported by credible evidence were seen as effective only if presented in an accessible way (Bates, Ayres et al. 2023).  **Signpostto evidence decision-makers were interested in:** health problems in localities (Carmichael, Barton et al. 2012), the causal pathways connecting health outcomes to wider determinants (Carmichael, Barton et al. 2012, Bates, Ayres et al. 2023, Le Gouais, Bates et al. 2023), and evidence showing the economic valuations of unhealthy urban development, where some kind of commercial advantage can be identified (Bates, Ayres et al. 2023). |
| ***Need for examples and actionable interventions*** | **Absence of ideas for how to incorporate health into urban planning:** Urban developers were interested in tools to support prioritising issues, understanding orders of magnitude and communicating value (Black, Pilkington et al. 2021). They wanted suggestions for interventions that are actionable, and evidence that provides a costing and an analysis of actionable alternatives (Riley and de Nazelle 2018). | **Provide training:** Key partners should develop multi-agency training courses, to improve knowledge and understanding of health bringing those partners together for shared learning and development of relationships (Carmichael, Barton et al. 2012)  **Draw attention to existing sources of health evidence** (Chang 2018).  **Support reflective and evaluative practice:**Healthy development involves a cyclical process where participants work to solve a problem, develop a solution, assess that solution, and then apply the insights gained to future endeavors. Utilising collaborative and collective knowledge can also facilitate this reflective practice (Pineo and Moore 2022).  **Support the inclusion of health in place making frameworks** (Chang 2018)***.***  **Use of industry-initiated standards demonstrating health** (Chang 2018). |
