# Supplementary material for: Development and optimisation of an intervention to increase the intention to act on health and health equity within the private sector of urban development: an evidence, theory and Person-Based Approach
Source: Research Square preprint supplement (doi:10.21203/rs.3.rs-5610820/v1), 2025-04-11
Supplement: Supplementary file 4 [file bfe2a12bca64e331f014cf98.docx]

Table 1: Studies included in the rapid scoping review with overview of barriers and facilitators to health/health inequalities being placed more centrally in the practice of decision makers in urban planning (in the private sector)

| **Study** | **Study description** | **Evidence of barriers to behaviour- Themes in bold**  (*methods to address barriers provided in corresponding brackets*) | **Evidence of facilitators- Themes in bold**  (*ways in which these could be incorporated in corresponding brackets*) |
| --- | --- | --- | --- |
| **Bates et al. (2023)** | **Study design:** Semi-structured interviews  **Aim:** To explore the types of health evidence that diverse actors find most persuasive in a complex policy system  **Method**: 132 multi-sectoral stakeholders spanning the urban development decision-making system. Using thematic analysis. Coding involved a deductive and inductive process. | **Perception that narrative accounts are biased:** Some participants expressed distrust towards narrative evidence, suggesting that certain stakeholders may intentionally distort information. Many referred to the necessity of data, statistics, and models to substantiate qualitative accounts. (*Recommendation: Use evidence-based narrative accounts alongside quantitative data.)*  **Evidence is not presented in a accessible way**: For most senior decision-makers, lengthy narrative reports are impractical. Many respondents highlighted that overly technical data is a barrier to its effective use, noting that not all decision-makers possess advanced technical skills. *(Recommendation: Provide concise narrative summaries with quantitative data in an easily interpretable format.)*  **Convincing private sector urban planners that health is their concern**: Several respondents noted that health is often not a high priority. However, when health-related costs directly affect an organisation’s finances, they are more motivated to act. *(Recommendation: Reduce psychological proximity by using emotive narratives and offering information on the commercial costs related to health. Provide a broad definition of health, showing its relevance to the urban environment and areas where the private sector operates.)*  **Health is not a top priority**: Investors and developers prioritise decisions based on financial viability rather than public health outcomes. Directors are primarily focused on aligning their company's actions with its goals and increasing its value, rather than prioritising health improvements. *(Recommendation: Increase the cognitive proximity to health by highlighting the urgency and relevance of acting on health concerns.)* | **Using evidence-based data in a way that provokes an emotional response**: Evidence presented as narratives that are built on relatable, real-world examples are important across a complex system. Designing messaging that has a strong emotional impact was seen as particularly persuasive. Lived experiences were shown to be important in getting the attention of busy people and making them care enough to invest valuable time in seeking change. (*An emotive narrative will be used to take the decision maker through the problem, solution and its impacts by drawing on relatable emotive stories*.)  **Need to pair narratives with accessible quantitative data evidence**: Narratives supported by credible evidence were seen as effective only if presented in an accessible way. This was true for all, but especially for decision makers with limited time and varying technical expertise. (*Short narratives will be used coupled with accessible quantitative data*)  **Types of data**: Stakeholders in the urban development sector responded positively to health evidence that demonstrates (i) negative health outcomes and (ii) the associated costs. Data on negative health impacts, such as death rates or cases of asthma and mental health issues, tend to resonate emotionally with people. Private sector actors showed a preference for evidence that highlights the economic impact of unhealthy urban development, especially when a commercial benefit can be identified. (*Potentially include information about commercial advantage of incorporating health- though care must be taken as this has the potential to increase health inequalities through the ‘green premium’*) |
| **Black et al** (2021)  Overcoming Systemic Barriers Preventing Healthy Urban Development in the UK: Main Findings from Interviewing Senior Decision-Makers During a 3-Year Planetary Health Pilot | **Study design**: Qualitative- semi structured interviews  **Aim**: Investigate the main barriers and opportunities for creating healthy urban environments.  **Method**: Two rounds of semi-structured interviews were undertaken with 15 senior decision-makers from the UK’s main urban development delivery agencies, both public and private. | **Short-termism (short term profit over long term gains):** Short term financial horizons (i.e. shareholder expectations and six-monthly reporting; sale of public assets for short-term gain). (*Highlight the urgency of placing health and health inequalities more centrally in planning reducing cognitive proximity/highlight potential of leaving a legacy)*  **Absence of ideas about how to effect change**: (*Need to provide links to tools/frameworks and examples of good practice*)  **Scepticism of current methods** **demonstrating social value:** Social valuation methods are being used by some private sector actors primarily as marketing, and possible negotiation, tools. (*Highlight examples of best practice that is not tokenistic*)  **Land banking:** Keeping hold of land so it raises in value e.g. waiting for planning permission/infrastructure to be improved (*cannot be addressed in our intervention*) | **Knowledge of the issue**: The majority of urban health challenges are well known to decision-makers, including air pollution, excessive car use, obesogenic food environments, mental health, and the need for access to nature. (*Provide evidence linking health outcomes to wider determinants rather than more obvious/known connections*)  **Tools**: Interested in tools to support prioritising issues, understanding orders of magnitude and communicating value (*Highlight tools that can be used*)  **Need for shared language and values**: (*Provide opportunities for different stakeholders to meet/join networks and discuss how to integrate health into their practice. Highlight best practice integrating health into the masterplan as an opportunity to share goals and language around health*) |
| **Carmicheal et al** (2012)  Integration of health into urban spatial planning through impact assessment: Identifying governance and policy barriers and facilitators | **Study design**: Literature review  **Aim**: Examining the barriers and facilitators in integrating health in spatial planning at the local, mainly urban, level, through appraisals.  While the focus is on the integration of health into urban spatial planning through impact assessment- there are general findings about integrating health into planning that can support our intervention planning. | **Overly narrow definition of health:** Is a major barrier to the better integration of health into the spatial planning system. Appraisals of planning proposals tended to focus on physical and environmental health concerns, such as air, water and noise issues, rather than on the broader social and cultural determinants of health. (*Provide the Wider determinants of health definition*)  **Lack of partnership working:** A lack of cross-sector understanding, including limited knowledge of planning by health professionals and vice versa, creates discomfort among partners and undermines trust. This, in turn, hampers the potential for future collaboration. Several authors highlight the constraints posed by limited time and human resources available to invest in building effective partnerships, which also affects the ability to conduct community engagement and participatory stakeholder workshops. (*Provide opportunities to network with people from different sectors and signpost to existing networks*)  **Different language and cultures:** Organisations who need to work together to integrate health into planning often have different cultures, and use different languages and terminologies. Causing issues with interpretation and contextualisation of key terms such as health. (*Provide definitions that can be used and shared and opportunity for discussion to establish a shared language and purpose*) | **Provide broad definition of health**: Using a broad definition of health should drive partnerships between health and planning professionals, better quality and range of evidence considered and refocus the problem definition towards the consideration of positive health impacts of plans/projects. (*Provide broad definition of health*)  **Use of data:** To provide the evidence of the health problems in localities, and to explore causal pathways connecting health outcomes to wider determinants. (*Provide evidence linking health outcomes to wider determinants*)  **Need for shared language and values:** Creating improved participatory models and inclusive partnerships, grounded in shared language, can facilitate the integration of diverse knowledge, expertise, and life experiences. This approach can also support the development of broader problem definitions that take into account the health impacts of planning decisions. (*Provide opportunities to network and join networks)*  **Provide training:** multi-agency training courses should be developed, to improve knowledge and understanding of health and to bring those partners together for shared learning and development of relationships (*Providing training workshops, with opportunities for cross-sector networking*)  **Partnership working:** Several studies identify the need for close partnership working from an early stage, including the development of a shared vision among partners through coalition and consensus building, formalised arrangements for partnership working, and explicit roles and responsibilities (*Highlight as example of good practice*) |
| **Chang et al** (2018)  TCPA  Securing constructive collaboration and consensus for planning healthy developments A report from the Developers and Wellbeing project | **Study design**: Workshops and interviews  **Aim**: This project explored how we can encourage a consensus between the public and private sectors and wider stakeholders about the need to build and sustain high-quality, healthy places.  **Methods**: Ten workshops with local authority planning and public health teams, housing developers and a wide network of stakeholders. Developers were interviewed to find out what they thought about their role in creating healthy places. | **Definition of health**: Generally developers are more comfortable talking about “wellbeing” rather than “health”. “Health”, to many people, means doctors and dentists, rather than the wider determinants of health. (*Provide definition of Wider determinants of health*)  **Believe they are already addressing health needs:** Developers involved in the project, either directly or indirectly, asserted that they were already acting on health, while some councils working with them strongly disagreed. It is possible that developers addressed the provision of healthcare facilities but were unaware that the councils also expected them to address broader public health concerns and the "wider determinants" of health through the design of the development. (*Provide a the Wider determinant of health definition and evidence to link health with these broader determinants*)  **Expectation that healthy environments cost more and reduce margins**: Developers were already familiar with and acknowledged the principles and guidelines for healthy development. The challenge lies in convincing them that "high quality" doesn't have to equate to "high specification" or "hard infrastructure," which often result in increased construction costs and, ultimately, higher house prices. (*Highlight alternative viability calculations)* | ***Supporting the argument for integrating health into urban planning:***  **Leaving a legacy**: (*Provide examples of companies that are looking to leave a legacy*)  **Premium associated with healthy environments**: developers are aware that they can add value to their developments by including “healthy” elements in them.(*To avoid contribution to the ‘green premium’-Provide information about alternate viability models- other benefits to the organisation of prioritising health e.g. reputation)*  ***Examples of how to integrate health into urban planning:***   - **Draw attention to existing sources of health evidence** - **Early involvement of stakeholders** - **Industry initiated standards demonstrating health:** - **Tools and frameworks**: - **Consensus on what a healthy development is and the key mechanisms for delivering it** (*Providing a definition of health and best practice examples*) |
| **Le Gouais et al.** (2023)  Understanding how to create healthier places: A qualitative study exploring the complex system of urban development decision-making | **Study design**: Qualitative semi-structured interviews  **Aim**: Explores how to influence healthier place-making with urban development decision makers  **Methods**: 132 multi-sectoral stakeholders spanning the urban development decision-making system. Using thematic analysis. Coding involved a deductive and inductive process. | **Where the responsibility lies for health**: Many stakeholders did not seem to view health as their responsibility. (*Highlight where they are able to make an impact*)  **Lack of perceived power:**  Private sector actors appeared motivated to improve people's health but felt they had limited power to integrate health into urban planning. (*Support the feeling of power through collective efficacy*)  **Old boys’ network:** Accusations of an ‘old boys’ network’ in some private sector organisations (*support the development of networks and collective efficacy to create the groundswell for change*)  **Knowledge**: Absence of a definition of health - shared language (*Provide definition of Wider determinants of health)*  **Competing priorities vs long termism (profit vs health)**: Private sector priorities tended to focus on maximising profits, which could conflict with healthy urban development outcomes. However, it appeared that some elements of the market (e.g. long-term and institutional investors) were increasingly needing to consider sustainability and wellbeing issues. (*Use mechanisms to increase proximity to the issue of health to increase the salience and urgency in their minds*)  **Issues with existing tools to demonstrate healthy spaces**: Some voluntary certifications were said to increase rental yields by attracting occupiers (e.g. BREEAM or WELL certification). However, it was also suggested that “you can cherry-pick which [standard] you want to use” and therefore it was easy to game. (*Provide best practice examples of how standards have been applied*) | **Broad definition of health**: (*need for a shared definition of health and definition of a ‘healthy’ urban development*).  **Data associating health with the urban environment:** A quantitative measure of health, similar to carbon metrics was described as potentially “hugely helpful” and monetising health benefits was seen as useful by some. (*Provide training including best practice examples of healthy urban development and signpost to HAUS model*))  **How to present the evidence**: Interviewees discussed “choosing the right language and the right argument for who you're trying to talk to”, which can involve both qualitative case studies and quantitative data. (*Present data as qualitative and quantitative, co-develop intervention with target group to ensure language is not off putting*)  **Power**: Understanding influences across the complex system may challenge beliefs of some investors and developers who thought they had a limited role in shaping health outcomes. (*Draw on collective efficacy to support the feeling of power to change*)  **Cost of healthier spaces (implications for inequalities):** Increased demand for healthier places could result in a ‘health premium’. (*Careful consideration needs to be made about the inclusion of information associating incorporation of health into planning with increased sales prices - may need to directly address the implications of this for health inequalities*).  **Long-termism (creating a legacy):** Some developers were “in it for the long term” which may increase consideration of health and wellbeing issues. (Highlight the legacy they are leaving)  **Champions/advocates**: ‘Relational capital’ was discussed as a way to initiate projects – people “that have really cared and have been really willing to drive it and eventually you bring everyone else” (*Develop buy in to prioritising health in urban planning by developing a ground swell of advocates through the intervention*) |
| **Pineo et al.** (2022)  Built environment stakeholders’ experiences of implementing healthy urban development: an exploratory study | **Study design:** Semi-structured interviews  **Aim**: To explore how the principles of healthy urbanism are put into practice through investigating built environment professionals’ experiences of implementing health in new urban developments.  **Methods**: Interviews with 31 built environment and public health professionals involved in such projects in Australia, China, England, the Netherlands, Sweden and the United States | **Gaps in knowledge of how to incorporate health** (*Highlight how others in the industry have integrated health into practice*)  **Outcome vs output driven** (short vs long-termism): Organisations more willing to take a healthy design approach were described as *outcome-driven-* with a long term approach to development. Those who are not described as *output-driven*. Both outcome- and output-driven developers were focused on finances. There was a perception that outcome-driven developers *want* homes that support health, sustainability, etc and want to get a good price for them. However, their outlook towards these goals means that health-promoting design is more likely to be integrated, within financial limits. (*Acknowledge the challenges that some of the target group target will have in shifting the focus of an output-driven organisation*)  **Risks to claiming healthy placemaking(e.g. lack of control, unknown costs, lack of expertise) *(****highlight that we are aware of the risks and how these can be mitigated****):***  **Communicate value and cost:** the current system does not allow developers from accounting for the wider economic costs and benefits of prioritising health in their financial viability calculations. (*Provide alternative cost-benefit analysis; HAUS*)  **Power**: There is an unresolved question as to whether professionals can ‘convince private sector developers’, with arguments about wider value. Pointing to inherent power differentials between developers and other . In addition to pragmatically evaluate the mechanisms that could change the viability equation for developers. (*Address power through collective efficacy & and introduce HAUS model to support alternate viability calculation*) | **Need for evidence linking design with health improvements**: Developers noted there was not always evidence available to demonstrate the added value of healthy developments. Making it difficult to build a *‘business case’*. *(Signpost to tools and information that demonstrates the link between health and urban planning)*  **Shift from short-term cost to long-term gain:** There was an indication of a recent shift in developers’ conceptualisations of economic value, from short-term costs to long-term gains, thereby affecting how design teams can make a business case. (*Highlight benefit of healthy places for legacy of the company*)  **Advocacy**: Participants spoke of discussing, persuading, negotiating, and influencing to bring forward specific healthy design measures. An American planner said *‘ … it’s all* (*Industry partner delivered intervention, and intervention that draws on collective efficacy*)  **Network building:** mechanisms to change power dynamics through networks and partnerships. Professional bodies and informal networks were described as key factors for sharing good practice and building capacity in the sector. (*Support network building, development of a shared language, collective efficacy*)  **Reflective and evaluative practice:** Participants use knowledge from experience and *‘intuition’*, in addition to evidence and research. Healthy development is an iterative process in which participants attempt to solve a problem, create a solution, critique that solution, and then take forward that knowledge in future practice. This responds to the ‘knowledge gap’ in integrating health into development, through reflective practice. Collaborative and shared knowledge was also used to achieve reflective practice. Bringing together professionals with diverse types of knowledge can deal with the complexity of urban health. (*Support reflective practice through discussion in the in-person event, through supporting network building/joining existing networks, and providing the example of reflective practice*) |
| **Riley and de Nazelle** (2018)  Barriers and Enablers of Integrating Health Evidence into Transport and Urban Planning and Decision Making | **Study design**: Literature review:  **Aim**: Highlights some of the barriers to integrating health into urban and transport planning and policy with the aim of suggesting opportunities through which these barriers may be overcome. | **Narrow understanding of health:** (*Provide definition of Wider determinants of health - and examples of how urban planners can influence wider determinants of health*)  **Translating evidence for urban planners**: Evidence often fails to effectively communicate the complex relationship between the urban environment and health - complexity so that decision makers are left with only a partial understanding. (*Provide qualitative and quantitative evidence together and an example using the HAUS model*)  **Lack of inter-sector collaboration**: (*Supporting networking*) | **Use of stories and case studies**:  Policymakers generally perceive stories and case studies as more compelling evidence than rigorous studies or literature syntheses. (*Provide case study with quantitative evidence*)  **Providing potential solutions**: Researchers could also work to better communicate their findings and suggest interventions that are actionable. (*Provide examples of how other organisations have prioritised health in their work*)  **Tools to support:** Evidence that provides a costing and an analysis of links between urban design features and health. (*Signpost to a costing tool - HAUS*)  **Intersectoral collaboration**: Could be encouraged through formal and informal structures. (*Support the development and strengthening of networks*) |
