# Supplementary material for: Development and optimisation of an intervention to increase the intention to act on health and health equity within the private sector of urban development: an evidence, theory and Person-Based Approach
Source: Research Square preprint supplement (doi:10.21203/rs.3.rs-5610820/v1), 2025-04-11
Supplement: Supplementary file 5 [file daf5ea5acfc9f9c98fad5bbd.docx]

Table 3: Guiding principles for the changing mindsets in urban planning and development intervention

| **Intervention objective** | **Evidence/ Theory** | **Theory applied in intervention features** | **Key design features to address the issue** |
| --- | --- | --- | --- |
| **Support the recognition of the power that the target group already have, and support them to recognise their collective power to increase the priority of health in urban planning and development** | The problem -  There are three types of power that are central to the inertia around health in urban development:   - 1. Private sector actors appeared motivated to improve people's health, but felt they had limited power to integrate health into urban planning (Le Gouais, Bates et al. 2023). - 2. There were accusations of an ‘old boys’ network’ in some private sector organisations that shaped decision-making (Le Gouais, Bates et al. 2023). - 3. There was uncertainty about whether private sector developers can be convinced with arguments about wider value, pointing to inherent power differentials between developers and other stakeholders (Pineo and Moore 2022).   Potential solutions from evidence/theory:   - For point 1 - Collective efficacy has been identified as a key leverage point (Meadows 1999). Bandura (1977) observed that a group’s confidence in their abilities was associated with greater success (Bandura, Freeman et al. 1999). In the context of this intervention, if individual decision-makers in urban planning believe the group has power to make changes through their unified efforts (overcome the challenges of improving health in urban environments), they will work to do so. - For points 2 and 3 - Frame health and health equity solutions/actions in language consistent with normative expectations of mainstream group (e.g. that health can help to make money, reduce risks etc.) (Foucault 1980). - For point 1: Discourse is what is thought of as 'true' within a context. When less accepted meanings gain traction, this creates power. The previous definitions, norms and values that led to certain individuals or groups being powerful shift, and power no longer resides with those who created the previous meanings, values and norms(Foucault 1980). - For points 2 and 3- There is evidence that people tend to listen and respond more strongly and consistently to those who we view as part of our peer groups and communities (Merton 1972). This also supports the reduction of social proximity as the industry partner is taking action to address issues of a socially distant target (users of the urban environment) [6] - For point 3 – reduce the proximity between developers and other stakeholders (Lee, Hon et al. 2018). Psychological proximity consists of cognitive and emotional proximities. Reduction of perceived cognitive and psychological proximity to the issue, has been associated with greater engagement with social campaigns (Lee, Hon et al. 2018). Perceived salience, knowledge, and relevance were demonstrated to be strong predictors of psychological proximity, which in turn leads to positive campaign outcomes (Lee, Hon et al. 2018). Emotional connectedness and empathy are determinants of emotional proximity (Lee, Hon et al. 2018). There is evidence that emotional intensity reduces perceived psychological distance (Van Boven, Kane et al. 2010). The reduction of social proximity also supports prosocial actions (Henderson, Huang et al. 2012). It has been proposed that when people learn about others who help those who are socially distant to themselves, prosocial actions will become more salient because it challenges the lay beliefs about distance and helping. (Henderson, Huang et al. 2012). | - Power-Resources, knowledge, confirm structuration - Collective efficacy- Social control Empowerment, Social cohesion | Supporting individuals to identify the power they already have:   - Points 1 and 2 - Enable individuals to recognise they have power in the form of choices to incorporate aspects of health into their practice e.g. investigating/researching health for themselves, encouraging the forging of connections with those who do have expertise (e.g. supporting the development of networks), applying methods and experience of other developers to their own work e.g. reflective practice, pilot work, placing a person in the organisation in charge of prioritising health   Supporting decision makers to recognize collective power to change:   - Point 1: Deliver the intervention in group settings, where individuals feel that they can make a change as part of a collective. Encourage the sharing of ideas about the issue to reduce psychological distance. Foster a sense of in-group belonging and a group mission using group discussion, time for informal networking/links to existing networks - Point 3: Provide evidence that contemporaries are already integrating health into their practice and reaping the benefits - Point 3: During discussion session- ask ‘What are colleagues in your industry already doing?’. This supports social control within the in-group, as people discuss and are made more aware of who they think is active and is acting in the ‘common good’.   Intervention delivered by an industry partner in the field of urban development:   - Points 2 and 3: Industry partners will present the invention session to address the issue of the ‘old boys’ club’ because the messaging is delivered by someone from the ‘in group’.     Running a collaborative event with the national government intervention arm of TRUUD. The event will bring together members of our target group in the private sector of urban development and policy makers- to support the formation of cross industry collaborations, increase access to information and to change Discourse around health, which could increase the sense of power in the group. |
| **Support the development of shared norms around health and the urban environment** | - **Shifting norms:** The predominant norm in urban development is often cited as the need for viability and to prioritise making a profit (baseline interviews). Urban developers spoke of discussing, persuading, negotiating, and influencing to bring forward specific healthy design measures (Pineo and Moore 2022). - There is evidence that **dynamic minority norms** (information about collective change in behaviour) can result in meaningful change in personal behaviour, which can occur even when the behaviour is not currently the norm **(Sparkman and Walton 2019)** - **Shifting of Discourse** to support the acceptance of new definitions, norms and values – thereby shifting power from individuals or groups from those who created previous meanings, values and norms (Foucault 1980). | - Power - knowledge, confirm structuring) - Collective efficacy - social cohesion, social control - Group norms - norms around profitability (traditional) and dynamic minority norms (e.g. norms around common good as relevant in urban development) | Support the 'defining of a new Discourse' that prioritises health in the urban environment through discussion and debate.   - The industry partner will pick up a minority norm and demonstrate that it is dynamic and moving in the direction of improved consideration of health e.g. by providing examples of best practice where other organisations are already taking steps to prioritise health. - Messages will be framed around cueing particular norms (e.g. norms around profitability (traditional) and dynamic minority norms (e.g. norms around common good as relevant in urban development)     Run events that involve individuals from different disciplines (e.g. policy makers, third sector) with the target group and provide opportunities for discussion and the shifting of Discourse. This will be in collaboration with the TRUUD programme’s policy intervention. Support the sharing of ideas and support the formation of networks and new norms, by providing the opportunity for discussion at intervention events and through networks joined following the event. |
| **Provide evidence of the link between health and health inequalities and the urban environment and impress the urgency of improving the urban environment in a way that connects at cognitive and emotional levels** | ***Barriers to change***  **Narrow definition of health:** Has led to many urban developers not viewing health as their responsibility (Le Gouais, Bates et al. 2023), or in their remit to influence (Riley and de Nazelle 2018) (Unpublished TRUUD Phase 1 data). Some felt they were already consulting on health and addressing issues, although they had not had input from the public health team, or they had not addressed the range of public health concerns and the “wider determinants” of health expected by the council (Chang 2018).  **Translation of evidence**: Evidence often fails to effectively communicate the relationship between the built environment and health that is complex, context specific and dynamic. So decision makers are often left with only a partial understanding (Riley and de Nazelle 2018). In many cases developers are unaware of how their development can make a specific impact on improving health and wellbeing (Chang 2018). Developers described needing to be convinced of the added value of healthy developments, about health improvements or financial benefits from other projects. The absence of evidence made building a *‘business case’* challenging (Pineo and Moore 2022)*.*  ***Facilitators to change***  **Convincing evidence***:* Designing messaging that has a strong emotional impact was seen as particularly persuasive. Lived experiences were shown to be important in getting the attention of busy people and making them care enough to invest valuable time in seeking change (Riley and de Nazelle 2018, Bates, Ayres et al. 2023) However, some urban developers have reported being distrustful of narrative evidence. Data, statistics and modelling were often referred to as necessary to underpin qualitative accounts (Bates, Ayres et al. 2023).  **Narrative accounts can reduce cognitive** and emotional proximity to an issue, which has been associated in greater engagement with social campaigns (Lee, Hon et al. 2018). ‘Communication strategies such as framing the campaign issue as salient and personally relevant can be used to increase a person's cognitive proximity toward the issue and consequently generate greater participation intentions. Similarly, enhancing knowledge about an issue by delivering information about the benefits of resolving the issue is another way to increase cognitive proximity. A person's increased cognitive proximity can partially lead to emotional connectedness and empathy toward people suffering from a social issue, which are critical predictors of individuals' willingness to engage in a relevant campaign (Lee, Hon et al. 2018)  **Accessible evidence:** Narratives supported by credible evidence were seen as effective only if presented in an accessible way. This was true for all, but especially for decision makers with limited time and varying technical expertise (Bates, Ayres et al. 2023). | - Collective efficacy - social cohesion - Power - knowledge, resources - Psychological proximity - cognitive and emotional | Features from evidence:   - To prevent alienation of target group, acknowledge that urban planners have a good knowledge of aspects of health and are already incorporating it into their practice to some degree. - Provide information on the wider determinants of health and how they influence health and health inequalities   Inclusion of information that reduces cognitive and emotional proximity:   - Pairing of short emotional narrative accounts underpinned with accessible statistical evidence linking the wider determinants of health with urban planning and development, and highlighting the urgency and increasing salience. Using the lived experience videos produced by the Public Engagement intervention of the TRUUD programme. - Provide examples of evidence linking the wider determinants of health and their impact on health inequalities to the urban environment to support understanding of the definition. Examples should be within the target user’s realm of influence and expertise, to demonstrate where they can make an impact on health (e.g. pollution, greenspaces) or health inequalities (e.g. affordable housing in healthy environments) (personally relevant information reduces *Psychological proximity*). - We may need to have the messaging repeated to increase familiarity and to encourage the formation of concrete ideas about the issue e.g. encourage sign up to the TRUUD newsletter, and accessing the website with more detailed information - Signpostto evidence linking the urban environment with health that decision-makers were interested in:e.g. the causal pathways connecting health outcomes to wider determinants and to urban design features (Carmichael, Barton et al. 2012, Bates, Ayres et al. 2023, Le Gouais, Bates et al. 2023). - Provide evidence linking health inequalities to the urban environment through examples in the lived experience video (from the TRUUD programme’s Public Engagement team’s intervention) |
| **Reinforce positive self-identity associated with being altruistic and doing the ‘right’ thing** | **Applying ethical guidelines***:* Although group norms are powerful in shaping behaviours (Smith and Louis 2009), people do not act due to normative conformity in many instances (Knoke and Wright-Isak 1982). Often people act because they perceive the behaviour or act to be the ‘right’ thing to do (Wendt 2001). These behaviours are ‘sociotropic’, and rest on judgements about whether the behaviour will promote societal welfare, rather than the individual (Suchman 1995), and are based on an existing value system (Aldrich and Fiol 1994). | - Psychological proximity - cognitive, emotional - Power - knowledge and resources - Social norms - profit maximization | We willhighlight potential benefits to society (e.g. reducing health inequalities and improving population health) or target group (e.g. by reinforcing positive self-identity, highlighting benefits to the organisation) |
| **Address the need for financial viability in the incorporation of health into urban planning and provide examples of how incorporating health could increase financial viability/ highlight mechanisms that could change the viability equation for developers.** | - Investors and developers make decisions based on financial viability and increasing the value of the company as opposed to improving health outcomes (Black, Pilkington et al. 2021, Bates, Ayres et al. 2023, Le Gouais, Bates et al. 2023). Where associated health costs have a direct financial impact on an organisation, they are energised to act (Black, Pilkington et al. 2021, Bates, Ayres et al. 2023). - Developers are aware that they can add value to their developments by including “healthy” elements in them. However, higher prices due to ‘green premiums’ may exacerbate inequalities (Le Gouais, Bates et al. 2023). - There was an indication of a recent shift in developers’ conceptualisations of economic value, from short-term costs to long-term gains, thereby affecting how design teams can make a business case (Pineo and Moore 2022, Le Gouais, Bates et al. 2023)*.* - Urban developers were interested in tools to support prioritising issues, understanding orders of magnitude and communicating value (Black, Pilkington et al. 2021). They wanted evidence that provides a costing and an analysis of actionable alternatives when integrating health into urban planning and development (Riley and de Nazelle 2018). | - Power - knowledge - Collective efficacy - social cohesion - Psychological proximity - cognitive | Provide examples of alternative viability:   - Although the target group were interested in the commercial advantages of building healthier environments, we will not be pursuing this because higher expected prices could exacerbate health inequalities. - Instead, we can provide alternative examples of how the incorporation of health can increase the value of the company/highlight mechanisms that could change the viability equation for developers - e.g.   - Focus on long-term gain - for example by highlighting the benefit of healthy places for legacy and reputation of the company and provide examples of other companies who are doing this.   - The focus on health will gain or strengthen the reputation of the organisation for being pioneers in the integration of health into urban planning. They are more likely to become a model of best practice for healthy land disposal and/or development. This has subsequent potential benefits of being asked by government departments to help shape policy and have more favourable outcomes in interactions with governments (such as in the planning process and in writing of legislation and supporting guidance).   Signpost to sources of health evidence and tools that can help support the cost/benefit analysis of incorporating health into urban planning and development: e.g**.** produced by Public Health England and councils, such as the Joint Strategic Needs Assessment. Provide information about the TRUUD Health Appraisal of Urban Systems (HAUS) model – a tool for the cost/benefit analysis of incorporating health into urban developments |
| **Reduce the perceived risk of claiming healthy placemaking** | Urban developers described perceived and actual risks of claiming healthy placemaking (Pineo and Moore 2022) (Stage 1 interviews), originating from:   - Lack of control about the measurable or perceived health impacts of development (Pineo and Moore 2022) - Perceived risk of costs associated with design team knowledge gaps, expensive materials or technical systems, certification, community participation, maintenance and more. There is also a lack of data about whether healthy buildings can achieve a higher value for commercial developers (Pineo and Moore 2022). - Challenge of applying industry standards: Healthy building standards (primarily WELL) require many verifications (e.g. air quality) when the building is occupied. This results in risks for design teams, developers, landlords and tenants, with no single party being in full control of the outcome. Standards increased transparency about building performance, thereby potentially increasing risk and responsibility for some parties. | - Psychological proximity -cognitive - Power - knowledge, resources - Social norms: incorporating health is risky | Acknowledge that change can feel risky.  Decrease the perception of risk of incorporating health into urban development by highlighting the other organisations that are already acting on health and how they are doing this - these will be examples in the presentation and website. |
| **Highlight potential legal risks of not considering health in urban planning** | Information from the law intervention from the TRUUD programme Phase 2:   - Possibility of highlighting the legal risks of not considering health in urban planning. Coroners are becoming more interested in cases of social welfare and this includes explicit linking of cause of death to issues in the urban environment - e.g. mould and pollution, rather than respiratory illness and asthma. In circumstances where a death is seen to be related to the urban environment, those responsible for the conditions (e.g. Local authorities and private companies) may be required to attend court cases - Being pulled in front of the coroner can damage reputation through being criticised and this information being reported on social media, but it is also used by lawyers as an efficient way to gather evidence for civil or criminal cases, as these parties are called to respond and provide evidence in the inquest case. - Local authorities have been called to account for – poorly undertaken refurbishment, mould, air quality. - Potential upcoming changes to policy environment creating necessary changes for industry; requirement for HIA increasing across new local plans. Requirement for developers to demonstrate HIA process is conducted by individuals with appropriate credentials. | - Power- knowledge - Psychological proximity- emotional, cognitive - Suggesting alternative Social norm- more risky to not incorporate health | **Increase perception of risk not incorporating health environments to increase proximity to the issue:**   - Highlight the legal risks of not considering health in urban planning and that legal tools are changing such that these types of cases are set to increase. E.g. coroner using urban environment as cause of death - which can have reputational issues for the company responsible - Could provide examples of newspaper headlines for land control**:** Ella Kissi-Debrah (air pollution) [Illegal levels of air pollution linked to child's death - BBC News](https://www.bbc.co.uk/news/science-environment-44612642) - Housing developer example: Awaab Ishak (mould) [Death of two-year-old from mould in flat a ‘defining moment’, says coroner | Housing | The Guardian](https://www.theguardian.com/uk-news/2022/nov/15/death-of-two-year-old-awaab-ishak-chronic-mould-in-flat-a-defining-moment-says-coroner) - Global example of changes in legislation related to the environment: European Court of Human Rights ‘inaction on climate change violated human rights’ |
| **Provide examples of how other urban development organisations are integrating and prioritising health and health inequalities** | **Absence of ideas about how incorporate health into urban development** (Black, Pilkington et al. 2021). They wanted suggestions for interventions that are actionable (Riley and de Nazelle 2018). | - Collective efficacy - empowerment - Power - knowledge, resources | - Provide and signpost to examples of where organisations have integrated wider determinants of health into urban development. - Highlight next steps integrating health in a way that makes it sound really easy to do. Depending how much experience they have integrating health into their work - Signpost to examples of how Health Impact Assessments and community health need assessments can support the consideration of health inequalities in projects. These tools can be used by urban decision-makers for local health equity monitoring processes, helping to identify, understand, access, and measure inequities - e.g. WHO Urban Health Equity Assessment and Response Tool – Urban HEART (WHO, [2010](https://link.springer.com/chapter/10.1007/978-3-030-93875-8_1#ref-CR88); Prasad et al., [2015](https://link.springer.com/chapter/10.1007/978-3-030-93875-8_1#ref-CR60); Novoa et al., [2018](https://link.springer.com/chapter/10.1007/978-3-030-93875-8_1#ref-CR55) |
| **The industry partner must find the intervention easy to deliver and have buy in to the content** | The industry partner will be a senior decision-maker in urban development. They will be very busy and therefore must be able to see the value in the delivery of the intervention for themselves and their organisation. | - Power - knowledge, resources - Collective efficacy - Psychological proximity - Shifting social norms | - The intervention must be easy to access and use for the person delivering it. There must be minimal training. The intervention will predominantly be delivered at events the industry partner was already planning on attending.   Highlight potential benefits to the individual, organisation and attendees of the project e.g.   - Develop a co-branded tool that can be used by the industry partner/organisation beyond the project. - Industry partner and organisation: Growth of reputation and esteem through being more connected to a politically important issue (health), and through improving their own knowledge base, including learning about examples of best practice. - Become more visible to policymakers and other influential people within the field - Organisation will gain or strengthen their reputation for being pioneers in the integration of health into urban planning and could become a model of best practice. - Highlight potential benefits of improving the urban environment E.g. benefits to society, benefits to the organisation (e.g. alternative viability mechanisms) or target group (e.g. reinforces positive self- identity). The intervention will be co-designed with the industry partner to ensure they are bought into the message and the delivery and it reflects the needs, issues and challenges of the target group. - The intervention will be co-branded and can be used by the industry partner/organisation beyond the project. |
| **The potential attendees of the intervention session must be able to see the value of the session to ensure they will want to attend** | Private sector actors appeared motivated to improve people's health, but felt they had limited power to integrate health into urban planning (Le Gouais, Bates et al. 2023). They generally prioritise financial viability and increasing the value of the company as opposed to improving health outcomes (Black, Pilkington et al. 2021, Bates, Ayres et al. 2023, Le Gouais, Bates et al. 2023). Where associated health costs have a direct financial impact on an organisation, they are energised to act (Black, Pilkington et al. 2021, Bates, Ayres et al. 2023). | - Power - Collective efficacy - Psychological proximity - Shifting social norms | - Deliver the intervention at urban development events – where the target group are already planning to attend rather than those focussed on health. - The intervention sessions will be advertised through conference event schedules. At the smaller events, attendees may be emailed ahead of the event. - For the event with the TRUUD national government team - potential attendees were selected from an existing list of senior decision-makers in urban development developed in Phase 1 of the project and invited by email. - The title of the session will be co-designed with the industry insider. The summary of the session for the programme will highlight benefits of attending, e.g. we will be giving examples of:   - Opportunities to integrate and prioritise health   - Examples of where other organisations have integrated health to urban planning and development   - Tools that can support cost/benefit analysis of integrating health into urban planning - Adverts will also highlight the prestige of the industry partner |
